# Supplementary material for: Functional Characterization of Zebrafish (Danio rerio) Bcl10
Source: PubMed Central journal article supplement (PMC4388727; doi:10.1371/journal.pone.0122365), 2015-04-07
Supplement: pone.0122365.s001.pdf [file pone.0122365.s001.pdf]

| Species                  | Identifier          |                |
|--------------------------|---------------------|----------------|
|                          | Ensemble            | GenBank        |
| Homo sapiens             | ENSP00000359612     |                |
| Gorilla gorilla gorilla  | ENSGGOP00000011801  |                |
| Pan troglodytes          | ENSPTRP00000001578  |                |
| Callithrix jacchus       | ENSCJAP00000046194  |                |
| Pongo abelii             |                     | XP_002810704.1 |
| Nomascus leucogenys      | ENSNLEP00000012221  |                |
| Macaca mulatta           | ENSMMUP00000007544  |                |
| Dipodomys ordii          | ENSDORP00000014040  |                |
| Tupaia chinensis         |                     | XP_006149503.1 |
| Vicugna pacos            |                     | XP_006205994.1 |
| Sorex araneus            | ENSSARP00000004540  |                |
| Rattus norvegicus        |                     | NP_112618.1    |
| Mus musculus             | ENSMUSP00000029842  |                |
| Myotis lucifugus         | ENSMLUP00000015461  |                |
| Oryctolagus cuniculus    | ENSOCUP00000013920  |                |
| Ochotona princeps        | ENSOPRP00000010338  |                |
| Bos taurus               | ENSBTAP00000018398  |                |
| Ovis aries               | ENSOARP00000015341  |                |
| Pteropus vampyrus        | ENSPVAP00000002651  |                |
| Ailuropoda melanoleuca   | ENSAMEP00000018226  |                |
| Canis lupus familiaris   | ENSCAFP00000030083  |                |
| Felis catus              | ENSFCAP00000022552  |                |
| Equus caballus           | ENSECAP00000022572  |                |
| Otolemur garnettii       | ENSOGAP00000008911  |                |
| Sus scrofa               |                     | NP_001096683.1 |
| Tursiops truncatus       | ENSTTRP00000001248  |                |
| Loxodonta africana       | ENSLAFP00000003045  |                |
| Echinops telfairi        | ENSETEP00000004326  |                |
| Dasyopus novemcinctus    |                     | XP_004480954.1 |
| Cavia porcellus          | ENSCPOP00000010610  |                |
| Mustela putorius furo    | ENSMPUP00000005407  |                |
| Monodelphis domestica    | ENSMODP00000000353  |                |
| Sarcophilus harrisii     |                     | XP_003767388.1 |
| Ornithorhynchus anatinus |                     | XP_001515760.1 |
| Taeniopygia guttata      |                     | XP_002186994.1 |
| Ficedula albicollis      | ENSFALP00000006480  |                |
| Meleagris gallopavo      |                     | XP_003208786.1 |
| Gallus gallus            | ENSGALP00000041735  |                |
| Pelodiscus sinensis      |                     | XP_006120365.1 |
| Anolis carolinensis      | ENSACAP00000012895  |                |
| Xenopus tropicalis       | ENSXETP00000006723  |                |
| Latimeria chalumnae      | ENSLACP00000019410  |                |
| Lepisosteus oculatus     |                     | XP_006634777.1 |
| Astyanax mexicanus       | ENSAMXP00000001313  |                |
| Danio rerio              | ENSDARP000000103460 |                |
| Gasterosteus aculeatus   | ENSGACP00000022771  |                |
| Oreochromis niloticus    | ENSONIP00000011727  |                |
| Takifugu rubripes        | ENSTRUP00000027403  |                |
